# Supplementary material for: Re-visiting the Protamine-2 locus: deletion, but not haploinsufficiency, renders male mice infertile
Source: PubMed Central journal article supplement (PMC5105070; doi:10.1038/srep36764), 2016-11-11
Supplement: srep36764-s1.pdf [file srep36764-s1.pdf]

## **Re-visiting the Protamine-2 locus: deletion, but not haploinsufficiency, renders male mice infertile**

Simon Schneider<sup>1</sup>, Melanie Balbach<sup>2</sup>, Jan Jikeli<sup>2</sup>, Daniela Fietz<sup>3</sup>, Daniel Nettersheim<sup>1</sup>, Sina Jostes<sup>1</sup>, Rovenna Schmidt<sup>3</sup>, Monika Kressin<sup>3</sup>, Martin Bergmann<sup>3</sup>, Dagmar Wachten<sup>2</sup>, Klaus Steger<sup>4</sup> and Hubert Schorle<sup>1</sup>

<sup>1</sup>Institute of Pathology, Department of Developmental Pathology, University of Bonn Medical School, Bonn, Germany

<sup>2</sup>Minerva Max Planck Research Group - Molecular Physiology,

Center of Advanced European Studies and Research, Bonn, Germany

<sup>3</sup>Institute of Veterinary-Anatomy, -Histology and -Embryology, Justus-Liebig University, Giessen, Germany

<sup>4</sup>Department of Urology, Pediatric Urology and Andrology, Section Molecular Andrology, Biomedical Research Center of the Justus-Liebig University, Giessen, Germany

\*Correspondence to Prof. Dr. Hubert Schorle, Institute of Pathology, Department of Developmental

Pathology, University Hospital Bonn, Sigmund-Freud-Str. 25, 53127 Bonn, Germany.

E-mail: [Hubert.Schorle@ukb.uni-bonn.de](mailto:Hubert.Schorle@ukb.uni-bonn.de)

**Supplementary Table 1: Oligonucleotides used in this study.**Oligonucleotides used for cloning and *in vitro* transcription of gRNAs, genotyping and qRT-PCR.

| <b>guide sequences</b> | <b>top strand oligo</b>  | <b>bottom strand oligo</b> |
|------------------------|--------------------------|----------------------------|
| Prm2 gRNA1             | CACCATGGTTCGCTACCGAATG   | AAACCATTTCGGTAGCGAACCAT    |
| Prm2 gRNA2             | CACCATAGTCCTCTACGCGCTC   | AAACGAGCGCGTAGAGGACTAT     |
| Prm2 gRNA3             | CACCGCTGAGCCCAGAGCGCGTAG | AAACCTACGCGCTCTGGGCTCAGC   |

  

| <b>PCR primer</b> | <b>forward primer</b> | <b>reverse primer</b> |
|-------------------|-----------------------|-----------------------|
| Prm2 sg1          | CCCCAAACACCAGACCATCA  | CCCTGTGTGTCCTCCCATAG  |
| Prm2 sg2/3        | GGTTCGCTACCGAATGAGGA  | GGGTGCTTACCTCTGCGAT   |
| Prm2 sg1-3        | TGCAGCCTCAATCCAGAACC  | TGTAGCCTCTTACGAGAGCAG |

  

| <b><i>in vitro</i> transcription</b> | <b>forward primer</b>                  | <b>reverse primer</b>                    |
|--------------------------------------|----------------------------------------|------------------------------------------|
| T7-Prm2-sgRNA1                       | TTAATACGACTCACTATAGGATGGTTCGCTACCGAATG | -                                        |
| T7-Prm2-sgRNA2                       | TTAATACGACTCACTATAGGATAGTCCTCTACGCGCTC | -                                        |
| T7-Prm2-sgRNA3                       | TTAATACGACTCACTATAGGGACAAGACCATGAACGCG | -                                        |
| T7-sgRNA                             | -                                      | AAAAGCACCGACTCGGTGCCGCTGAGCCCAGAGCGCGTAG |

  

| <b>qRT-PCR</b> | <b>forward primer</b> | <b>reverse primer</b> |
|----------------|-----------------------|-----------------------|
| Prm2           | ATGGTTCGCTACCGAATGAGG | CTCCGCCTTCTGCATGACC   |
| Prm1           | GACAGCCCACAAAATTCCAC  | CAGAGCAGGGGACACCAC    |
| beta-Actin     | TGTTACCAACTGGGACGACA  | GGGGTGTGAAGGTCTCAAA   |
